# Supplementary material for: Process Mapping and Optimization Study of CHO Cell Cultures for mAb Production using Ambr® 250 High-throughput Parallel Bioreactors
Source: Research Square preprint supplement (doi:10.21203/rs.3.rs-6831589/v1), 2025-06-15
Supplement: Supplementary file 1 [file 58386353cbd0e5671f520e9a.docx]

**Process Mapping and Optimization Study of CHO cell cultures for mAb Production using Ambrâ 250 High-throughput Parallel Bioreactors**

Bordoloi A.1,2 and Talebnia Rowshan, F.1,2*

1Department of Sustainable Chemical, Biological and Materials Engineering, University of Oklahoma, Norman 73019, USA

2 OU Bioprocessing Core Facility, 655 Research Parkway, Suite 310, Oklahoma City 73104, OK, USA

Corresponding Author: Talebnia Rowshan F.

[f.talebnia@ou.edu](mailto:f.talebnia@ou.edu)

**Supplementary Information**

Fig. S1. Bivariate fit of Glutamate by Feed Rate at harvest

Table S1. The yield of lactate production during the exponential phase for DoE runs

| **Experimental Plan** | **Gluc consumed (g/L)** | **Lac produced (g/L)** | **YLac/Glu** |
| --- | --- | --- | --- |
| B1 | 3.48 | 1.3 | 0.37 |
| B2 | 3.39 | 1.24 | 0.37 |
| B3 | 3.56 | 1.31 | 0.37 |
| B4 | 2.66 | 1.29 | 0.48 |
| B5 | 2.57 | 1.23 | 0.48 |
| B6 | 4.36 | 1.3 | 0.30 |
| B7 | 4.18 | 1.28 | 0.31 |
| B8 | 3.36 | 1.28 | 0.38 |
| B9 | 3.81 | 1.28 | 0.34 |
| B10 | 3.28 | 1.3 | 0.40 |

Fig S2: Contour plots

Fig S3: Desirability profile for optimization
